# Supplementary material for: Flexible modelling of risk factors on the incidence of pneumonia in young children in South Africa using piece-wise exponential additive mixed modelling
Source: BMC Med Res Methodol. 2021 Jan 11;21:17. doi: 10.1186/s12874-020-01194-6 (PMC7802241; doi:10.1186/s12874-020-01194-6)
Supplement: Supplementary file 1 — Additional file 1 Supplementary file. [file 12874_2020_1194_MOESM1_ESM.xlsx]

## Sheet: Sheet1
id
